# Supplementary material
Source: Springer Nature journal article supplement (https://www.springermedizin.de/resource/supplementary/12982_2010_94_MOESM1_ESM.pdf/9604464)
Supplement: MOESM1 [file 9604464]

AND

OR OR  
OR OR

Search terms:  
Exp/ Brain injuries/  
Brain injury (key word)  
International Classification  
of Diseases  
ICD-10

OVID 1950+ results: N=58  
PubMed N=95  
Web of Knowledge N= 45  
**Unique N=104**  
Search date: June 5, 2010

13— Post-concussional syndrome  
34— used ICD-8 or ICD-9  
49 — did not define traumatic brain  
injuries

Studies remaining: 8

5— reports identified through Grey  
literature (Google) search  
3—papers identified in the references  
of two international review papers

17 — papers and reports met inclusion criteria  
15 — unique definitions identified
